# Supplementary material
Source: publisher site journal article supplement (https://www.dovepress.com/article/supplementary_file/544389/Appendix.docx)
Supplement: Supplementary file 1 [file Appendix.docx]

**Appendix 1. Electronic database search strategy.**

**PubMed**

#1 "Cognitive Dysfunction"[Mesh]

#2 "Cognitive Dysfunction" [Title/Abstract] OR "Cognitive Impairment" [Title/Abstract] OR "Age-Related Memory Disorders" [Title/Abstract] OR "Mild Cognitive Impairment" [Title/Abstract] OR "MCI" [Title/Abstract] OR "Mild Neurocognitive Disorder" [Title/Abstract] OR "Cognitive Decline" [Title/Abstract] OR "Mental Deterioration" [Title/Abstract]

#3 #1 OR #2

#4 "Stroke" [Title/Abstract] OR "hemorrhage" [Title/Abstract] OR "cerebrovascular" [Title/Abstract] OR "cerebral hemorrhage" [Title/Abstract] OR "Post-stroke" [Title/Abstract] OR "apoplexy" [Title/Abstract] OR "CVA" [Title/Abstract]

#5 #3 AND #4

#6 "Acupuncture therapy"[Mesh]

#7 "acupuncture therapy"[Title/Abstract] OR "acupuncture"[Title/Abstract] OR "acupuncture-moxibustion"[Title/Abstract] OR "meridian*"[Title/Abstract] OR "acupoint*"[Title/Abstract] OR "warm needling"[Title/Abstract] OR "warm acupuncture"[Title/Abstract] OR "acupuncture plus moxibustion"[Title/Abstract] OR "electronic acupuncture"[Title/Abstract] OR "electro-acupuncture"[Title/Abstract] OR "electroacupuncture"[Title/Abstract] OR "fire acupuncture"[Title/Abstract] OR "auricular needle"[Title/Abstract] OR "scalp needle"[Title/Abstract] OR "abdominal needle"[Title/Abstract] OR "wrist ankle needle"[Title/Abstract] OR "triple puncture"[Title/Abstract] OR "dry needle"[Title/Abstract] OR "needle"[Title/Abstract] OR "body acupuncture"[Title/Abstract] OR "manual-acupuncture"[Title/Abstract] OR "transcutaneous electrical acupoint stimulation"[Title/Abstract] OR "TEAS"[Title/Abstract]

#8 #6 OR #7

#9 "neuroimaging"[Mesh] OR "magnetic resonance imaging"[Mesh] OR "Positron-Emission Tomography"[Mesh] OR "magnetic resonance imaging"[Mesh]

#10 "neuroimaging"[Title/Abstract] AND "magnetic resonance imaging"[Title/Abstract] OR "Positron-Emission Tomography"[Title/Abstract] OR "functional magnetic resonance imaging"[Title/Abstract] OR "fMRI"[Title/Abstract] OR "functional image"[Title/Abstract] OR "Diffusion Tensor Imaging"[Title/Abstract] OR "DTI"[Title/Abstract] OR "structural magnetic resonance imaging"[Title/Abstract] OR "sMRI"[Title/Abstract] OR "functional near-infrared spectroscopy"[Title/Abstract] OR "electroencephalography"[Title/Abstract] OR "magnetic resonance spectroscopy"[Title/Abstract] OR "magnetoencephalography"[Title/Abstract]

#11 #9 OR #10

#12 #5 AND #8 AND #11

**EMBASE**

#1 'cognitive dysfunction'/exp/mj

#2 'cognitive dysfunction':ti,ab,kw OR 'cognitive impairment':ti,ab,kw OR 'age-related memory disorders':ti,ab,kw OR 'mild cognitive impairment':ti,ab,kw OR 'mci':ti,ab,kw OR 'mild neurocognitive disorder':ti,ab,kw OR 'cognitive decline':ti,ab,kw OR 'mental deterioration':ti,ab,kw

#3 #1 OR #2

#4 'Stroke':ti,ab,kw OR 'hemorrhage':ti,ab,kw OR 'cerebrovascular':ti,ab,kw OR 'cerebral hemorrhage':ti,ab,kw OR 'Post-stroke':ti,ab,kw OR 'apoplexy':ti,ab,kw OR 'CVA':ti,ab,kw

#5 #3 AND #4

#6 'acupuncture therapy'/exp/mj

#7 'acupuncture therapy':ti,ab,kw OR 'acupuncture:ti,ab,kw' OR 'acupuncture moxibustion':ti,ab,kw OR meridian*:ti,ab,kw OR acupoint*:ti,ab,kw OR 'warm needling':ti,ab,kw OR 'warm acupuncture':ti,ab,kw OR 'acupuncture plus moxibustion':ti,ab,kw OR 'electronic acupuncture':ti,ab,kw OR 'electro acupuncture':ti,ab,kw OR 'electroacupuncture':ti,ab,kw OR 'fire acupuncture':ti,ab,kw OR 'auricular needle':ti,ab,kw OR 'scalp needle':ti,ab,kw OR 'abdominal needle':ti,ab,kw OR 'wrist ankle needle':ti,ab,kw OR 'triple puncture':ti,ab,kw OR 'dry needle':ti,ab,kw OR 'needle':ti,ab,kw OR 'body acupuncture':ti,ab,kw OR 'manual acupuncture':ti,ab,kw OR 'transcutaneous electrical acupoint stimulation':ti,ab,kw OR 'TEAS':ti,ab,kw

#8 #6 OR #7

#9 'neuroimaging'/exp OR 'magnetic resonance imaging'/exp OR 'Positron-Emission Tomography'/exp OR 'magnetic resonance imaging'/exp

#10 'neuroimaging':ti,ab,kw OR 'magnetic resonance imaging':ti,ab,kw OR 'Positron-Emission Tomography':ti,ab,kw OR 'functional magnetic resonance imaging':ti,ab,kw OR 'fMRI':ti,ab,kw OR 'functional image':ti,ab,kw OR 'Diffusion Tensor Imaging':ti,ab,kw OR 'DTI':ti,ab,kw OR 'structural magnetic resonance imaging':ti,ab,kw OR 'sMRI':ti,ab,kw OR 'functional near-infrared spectroscopy':ti,ab,kw OR 'electroencephalography':ti,ab,kw OR 'magnetic resonance spectroscopy':ti,ab,kw OR 'magnetoencephalography':ti,ab,kw

#11 #9 OR #10

#12 #5 AND #8 AND #11

**Web of science**

(TS=(‘cognitive dysfunction’ OR ‘cognitive impairment’ OR ‘age-related memory disorders’ OR ‘mild cognitive impairment’ OR ‘mci’ OR ‘mild neurocognitive disorder’ OR ‘cognitive decline’ OR ‘mental deterioration’) AND TS= (‘stroke’ OR ‘hemorrhage’ OR ‘cerebrovascular’ OR ‘cerebral hemorrhage’ OR ‘Post-stroke’ OR ‘apoplexy’ OR ‘CVA’ ) AND TS= (‘acupuncture-moxibustion’ OR ‘meridian*’ OR ‘acupoint*’ OR ‘warm needling’ OR ‘warm acupuncture’ OR ‘acupuncture plus moxibustion’ OR ‘transcutaneous electrical acupoint stimulation’ OR ‘TEAS’) AND TS=(‘neuroimaging’ OR ‘magnetic resonance imaging’ OR ‘Positron-Emission Tomography’ OR ‘functional magnetic resonance imaging’ OR ‘fMRI’ OR ‘functional image’ OR ‘Diffusion Tensor Imaging’ OR ‘DTI’ OR ‘structural magnetic resonance imaging’ OR ‘sMRI’ OR ‘functional near-infrared spectroscopy’ OR ‘electroencephalography’ OR ‘magnetic resonance spectroscopy’ OR ‘magnetoencephalography’))

**Cochrane Library**

#1 Mesh descriptor: [Cognitive Dysfunction] explode all trees

#2 cognitive dysfunction:ti,ab,kw OR cognitive impairment:ti,ab,kw OR age-related memory disorders:ti,ab,kw OR mild cognitive impairment:ti,ab,kw OR mci:ti,ab,kw OR mild neurocognitive disorder:ti,ab,kw OR cognitive decline:ti,ab,kw OR mental deterioration:ti,ab,kw

#3 #1 OR #2

#4 stroke:ti,ab,kw OR hemorrhage:ti,ab,kw OR cerebrovascular:ti,ab,kw OR cerebral hemorrhage:ti,ab,kw OR Post-stroke:ti,ab,kw OR apoplexy:ti,ab,kw OR CVA:ti,ab,kw

#5 #3 AND #4

#6 Mesh descriptor: [acupuncture therapy] explode all trees

#7 acupuncture therapy:ti,ab,kw OR acupuncture:ti,ab,kw OR acupuncture moxibustion:ti,ab,kw OR meridian*:ti,ab,kw OR acupoint*:ti,ab,kw OR warm needling:ti,ab,kw OR warm acupuncture:ti,ab,kw OR acupuncture plus moxibustion:ti,ab,kw OR electronic acupuncture:ti,ab,kw OR electro acupuncture:ti,ab,kw OR electroacupuncture:ti,ab,kw OR fire acupuncture:ti,ab,kw OR auricular needle:ti,ab,kw OR scalp needle:ti,ab,kw OR abdominal needle:ti,ab,kw OR wrist ankle needle:ti,ab,kw OR triple puncture:ti,ab,kw OR dry needle:ti,ab,kw OR needle:ti,ab,kw OR body acupuncture:ti,ab,kw OR manual acupuncture:ti,ab,kw OR transcutaneous electrical acupoint stimulation:ti,ab,kw OR TEAS:ti,ab,kw

#8 #6 OR #7

#9 Mesh descriptor: [neuroimaging] explode all trees

#10 Mesh descriptor: [magnetic resonance imaging] explode all trees

#11 Mesh descriptor: [Positron-Emission Tomography] explode all trees

#12 Mesh descriptor: [magnetic resonance imaging] explode all trees

#13 neuroimaging:ti,ab,kw OR magnetic resonance imaging:ti,ab,kw OR Positron-Emission Tomography:ti,ab,kw OR functional magnetic resonance imaging:ti,ab,kw OR fMRI:ti,ab,kw OR functional image:ti,ab,kw OR Diffusion Tensor Imaging:ti,ab,kw OR DTI:ti,ab,kw OR structural magnetic resonance imaging:ti,ab,kw OR sMRI:ti,ab,kw OR functional near infrared spectroscopy:ti,ab,kw OR electroencephalography:ti,ab,kw OR magnetic resonance spectroscopy:ti,ab,kw OR magnetoencephalography:ti,ab,kw OR electroencephalogram:ti,ab,kw

#14 #9 OR #10 OR #11 OR #12 OR #13

#15 #5 AND #8 AND #14

**Appendix 2. Rationale for excluding five full-text studies.**

| Full-text articles excluded | Reasons |
| --- | --- |
| Shang et al.,2022[87] | Not neuroimaging study |
| Hu, 2019[88] | Not neuroimaging study |
| Xiong, 2023[29] | Ineligible intervention |
| Sun et al., 2019[28] | Ineligible intervention |
| Lin, 2014[89] | Ineligible intervention |

**References:**

87. Shang, Y. X., Zhang, D., and Zhang, J. L. (2022). The effects of scalp acupuncture combined with transcranial magnetic stimulation on cognitive function, hemodynamics, and brain-derived neurotrophic factor after stroke. *Mod. J. Integr. Tradit. Chin. West. Med.* 31, 693-696. doi: 10.3969/j.issn.1008-8849.2022.05.021

88. Hu, S. X. (2019). Thermal acupuncture treatment for cognitive impairment after cerebral hemorrhage: a clinical observation of 40 cases. *Chin. J. Ethnomed. Ethnopharm.* 28, 102-104. doi: 10.3969/j.issn.1007-8517.2019.2.zgmzmjyyzz201902030

89. Lin, Z. C. (2014). *Analysis of central mechanism of cognitive impairment after stroke and the central mechanism of acupuncturing Baihui on cognitive impairment after stroke: resting-state functional magnetic resonance imaging study.* Fujian University of Traditional Chinese Medicine.

**Appendix 3. Randomized studies' methodological quality assessments.**

| Study | Randomisation process | Deviations from intended interventions | Missing outcomes data | Measurement of the outcome | Selection of the reported results | Overall |
| --- | --- | --- | --- | --- | --- | --- |
| Wang 2021[44] | Some concerns | Some concerns | Low | Low | Some concerns | Some concerns |
| Yu 2021[47] | Low | Some concerns | Low | Low | Some concerns | Some concerns |
| Chen 2020[27] | Some concerns | Some concerns | Low | Low | Some concerns | Some concerns |
| Zhang 2020[30] | Low | Some concerns | Low | Low | Some concerns | Some concerns |
| Guan 2019[41] | Low | Some concerns | Some concerns | Low | Some concerns | Some concerns |
| Zhong 2018[43] | Low | Low | Low | Low | Some concerns | Some concerns |
| Yang 2017[49] | Low | Some concerns | Some concerns | Low | Some concerns | Some concerns |
| Zhang 2015[50] | Low | Some concerns | Low | Low | Some concerns | Some concerns |
| Wang 2014[46] | Some concerns | Some concerns | Low | Low | Some concerns | Some concerns |

**Appendix 4. Non-randomized studies' methodological quality assessments.**

| Study | Bias due to confounding | Bias in selection of participants into study | Bias in classification of interventions | Bias due to deviations from intended interventions | Bias due to missing data | Bias in measurement of outcomes | Bias in selection of the reported result | Overall |
| --- | --- | --- | --- | --- | --- | --- | --- | --- |
| Li 2023[45] | Low | Low | Low | Low | Moderate | Low | Low | Moderate |
| Wang 2021[44] | Moderate | Low | Low | Low | Low | Low | Low | Moderate |
| Na 2021[48] | Low | Low | Low | Low | Moderate | Low | Low | Moderate |

**Appendix 5. Results of neuroimaging following repeated acupuncture.**

| **Study** | **Neuroimaging technologies** | **Assessment criteria** | **Neuroimaging results** |
| --- | --- | --- | --- |
| Li 2023[45] | fMRI (ALFF) | Voxel-level: *p*<0.05  Cluster-level: *p*<0.05 (GRF-corrected) | PSCI patients before needling vs. HC: *decreased ALFF values* in the right precuneus.  PSCI patients before needling vs. PSCI patients after needling: *increased ALFF values* in the left fusiform gyrus and *decreased ALFF values* in the right superior occipital gyrus. |
| fMRI (ReHo) | PSCI patients before needling vs. HC: *decreased* *Reho* of left cerebellar peduncle II. |
| fMRI (DC) | PSCI patients before needling vs. HC: *decreased* *DC value* of right Precuneus. |
| Wang 2021[44] | fMRI (betweenness centrality) | Sparsity range: 0.10–0.28 (step 0.01) | PSCI patients before needling vs. HC: *increased betweenness centrality* in the left cuneus and right transverse temporal gyrus.  AG after needling vs. AG before needling: *decreased betweenness centrality* in the left posterior cingulate gyrus and left cuneus decreased compared to before treatment. |
| fMRI (degree centrality) | PSCI patients before needling vs. HC: *increased degree centrality* in the left dorsolateral superior frontal gyrus, left posterior cingulate gyrus,left angular gyrus of the parietal lobule, and right transverse temporal gyrus and *decreased* *degree centrality* in the right middle frontal gyrus, right opercular part of the inferior frontal gyrus, and left middle occipital gyrus.  AG after needling vs. AG before needling: *increased degree centrality* in the left lingual gyrus, right lingual gyrus, and left inferior occipital gyrus and *decreased* *degree centrality* in the right orbital middle frontal gyrus. |
| fMRI (local efficiency) | PSCI patients before needling vs. HC: *increased local efficiency* in the right orbital superior frontal gyrus, right medial orbital superior frontal gyrus, left medial and parahippocampal gyrus, right supramarginal gyrus, left superior temporal gyrus.  AG after needling vs. AG before needling: *increased local efficiency* in the left parahippocampal gyrus, right inferior occipital gyrus, left fusiform gyrus, left lateral temporal gyrus, and de*creased local efficiency* in the right angular gyrus. |
| Wang 2021[42] | fMRI (FC) | Voxel-level:  *p*<0.05 (uncorrected)  Cluster-level: Not specified | AG after needling vs. AG before needling: *increased* *FC* of the left hippocampus to the right inferior gyrus/middle frontal gyrus, the right hippocampal FC to the left middle gyrus/inferior gyrus/superior frontal gyrus and the parietal lobe. |
| Na 2021[48] | fMRI (ALFF) | Voxel-level:  *p*<0.01 (AlphaSim correction) Cluster-level:  *p*<0.01 (AlphaSim correction) | AG after needling vs. AG before needling: *increased ALFF values* in the anterior cuneiform lobe, superior parietal gyrus, and *decreased ALFF values* in the inferior temporal gyrus, fusiform gyrus. |
| fMRI (ReHo) | AG after needling vs. AG before needling: *increased* *Reho* of superior parietal gyrus, anterior cuneiform lobe, and *decreased* *Reho* of middle temporal gyrus, parahippocampal gyrus, lentiform nucleus and ventrolateral thalamic nucleus. |
| fMRI (FC) | AG after needling vs. AG before needling: *increased* *FC* of the inferior parietal lobe, anterior cuneiform lobe, posterior cingulate gyrus, superior occipital gyrus, angular gyrus, superior marginal gyrus and superior temporal gyrus; *decreased FC* of the middle occipital gyrus. |
| Yu 2021[41] | fMRI (ALFF) | Voxel-level:  *p*<0.001 (uncorrected)  Cluster-level:  *p*<0.05 (FWE-corrected) | AG after needling and training vs. PSCI after training: *increased* *ALFF values* in the right parahippocampal gyrus, left thalamus, right insula and left anterior cingulate gyrus; *decreased* *ALFF* *values* in the left posterior cerebellar lobe, left inferior temporal gyrus, right inferior temporal gyrus, left inferior frontal gyrus, left middle temporal gyrus, left inferior occipital gyrus and left superior parietal lobule. |
| Chen 2020[47] | fNIRS | Not applicable | PSCI patients before needling vs. CM: *increased the cerebral oxy-Hb and total Hb levels* in left prefrontal cortex, right prefrontal cortex, left motor cortex, and right motor cortex.  AG after needling and CM vs. AG before needling and CM: *increased the cerebral oxy-Hb, total Hb and deoxy-Hb level* in left prefrontal cortex, right prefrontal cortex, left motor cortex, and right motor cortex*.*  AG after needling and CM vs. CM: *increased the cerebral oxy-Hb, total Hb and deoxy-Hb level* in left prefrontal cortex, right prefrontal cortex, left motor cortex, and right motor cortex*.* |
| Zhang 2020[30] | MRS | Not applicable | PSCI patients after training vs. PSCI patients before training /  AG after needling and training vs. AG before needling and training: *increased NAA/Cr* at the lesion of cerebral infarction, *decreased* *Cho/Cr* and *MI/Cr* at the lesion of cerebral infarction. |
| Guan 2019[41] | fMRI (ReHo) | Cluster-level:  *p*<0.05 (FDR-corrected) | PSCI patients before needling vs. HC: *increased* *Reho* of left superior frontal gyrus, and *decreased* *Reho* of right inferior frontal gyrus, left middle temporal gyrus and bilateral superior temporal gyrus.  PSCI patients before CM vs. PSCI patients after CM: *increased* *Reho* of left parahippocampal gyrus, right temporal polar region and right middle frontal gyrus, and *decreased* *Reho* of bilateral inferior frontal gyrus and left posterior central gyrus.  AG after needling and training vs. AG before needling and training: *increased* *Reho* of right anterior central gyrus, left parahippocampal gyrus, right temporal polar region, left middle temporal gyrus, and *decreased* *Reho* of bilateral inferior frontal gyrus and right inferior temporal gyrus.  AG after needling and training vs. PSCI patients after CM: *increased* *Reho* of right inferior temporal gyrus and inferior frontal gyrus. |
| fMRI (ALFF) | PSCI patients before needling vs. HC: *increased* *ALFF values* in the bilateral superior frontal gyrus and right middle temporal gyrus; *decreased* *ALFF* *values* in the left inferior temporal gyrus, anterior cingulate gyrus, angular gyrus and central anterior gyrus.  PSCI patients before CM vs. PSCI patients after CM: *increased* *ALFF values* in right inferior frontal gyrus, right middle frontal gyrus and right middle temporal gyrus; *decreased* *ALFF* *values* in the left dorsolateral superior frontal gyrus.  AG after needling, training and CM vs. AG before needling, training and CM: *increased* *ALFF values* in the right triangular inferior frontal gyrus, left parahippocampal gyrus, angular gyrus and cingulate gyrus.  AG after needling, training and CM vs. PSCI patients after CM: *increased* *ALFF values* in the right fusiform gyrus, parahippocampal gyrus, putamen, dorsolateral prefrontal cortex, inner olfactory cortex and middle frontal gyrus; *decreased* *ALFF* *values* in the bilateral anterior central gyrus. |
| Zhong 2018[43] | fMRI (ALFF) | Voxel-level:  *p*<0.005 (uncorrected)  Cluster-level:  *p*<0.05 (GRF-corrected), minimum cluster size = 12 voxels | Difference in AG before and after needling and training vs. Difference in PSCI patients before and after needling and training:The changes in the *ALFF values* before and after the treatment were compared in two groups, the right parietal lobule, the left posterior cingulate gyrus, right frontal gyrus, right middle temporal gyrus, right inferior frontal gyrus and right posterior central gyrus was significant different between the two groups. |
| Yang 2017[49] | EEG | Not applicable | AG after needling and training vs. CM after training: *shortened* the latency of P300 potential and *prolongated* the amplitude of P300 in the frontal lobe, parietal lobe, precentral gyrus, and postcentral gyrus. |
| Zhang 2015[50] | EEG | Not applicable | PSCI patients after training vs. PSCI patients before training /  AG after needling and training vs. AG before needling and training: *shortened* the latency of N300 potential and *prolongated* the amplitude of N300 in the frontal lobe, the precentral gyrus, the postcentral gyrus, and the frontocentral area. |
| Wang 2014[46] | MRS | Not applicable | PSCI patients after CM vs. PSCI patients before CM /  AG after needling and CM vs. AG before needling and CM: *increased NAA/Cr* in hippocampus, *decreased* *Cho/Cr* in hippocampus. |

Notes: PSCI: post-stroke cognitive impairment; HC: healthy control; AG, acupuncture group; CM: conventional medicine; rTMS: repetitive transcranial magnetic stimulation; TMS: transcranial magnetic stimulation; DC: degree centrality; fNIRS: functional near - infrared spectroscopy; EGG: electroencephalogram; MRS: magnetic resonance spectroscopy; NAA: N-acetylaspartate; Cr: Creatine; Cho: Cholines; MI: Myo-Inositol; fMRI: functional magnetic resonance imaging; ALFF: amplitude of low frequency fluctuations; ReHo: regional homogeneity; FC: functional connectivity; GRF: Gaussian Random Field; FWE: Family-Wise Error; FDR: False Discovery Rate; AlphaSim: Alpha Simulation;
